# Vivo-Morpholinos Induced Transient Knockdown of Physical Activity Related Proteins

David P. Ferguson\*, Emily E. Schmitt, J. Timothy Lightfoot

Department of Health and Kinesiology, Texas A&M University, College Station, Texas, United States of America

## Abstract

Physical activity is associated with disease prevention and overall wellbeing. Additionally there has been evidence that physical activity level is a result of genetic influence. However, there has not been a reliable method to silence candidate genes *in vivo* to determine causal mechanisms of physical activity regulation. Vivo-morpholinos are a potential method to transiently silence specific genes. Thus, the aim of this study was to validate the use of Vivo-morpholinos in a mouse model for voluntary physical activity with several sub-objectives. We observed that Vivo-morpholinos achieved between 60–97% knockdown of *Drd1*-, *Vmat2*-, and *Glut4*-protein in skeletal muscle, the delivery moiety of Vivo-morpholinos (scramble) did not influence physical activity and that a cocktail of multiple Vivo-morpholinos can be given in a single treatment to achieve protein knockdown of two different targeted proteins in skeletal muscle simultaneously. Knocking down *Drd1*, *Vmat2*, or *Glut4* protein in skeletal muscle did not affect physical activity. Vivo-morpholinos injected intravenously alone did not significantly knockdown *Vmat2*-protein expression in the brain ( $p=0.28$ ). However, the use of a bradykinin analog to increase blood-brain-barrier permeability in conjunction with the Vivo-morpholinos significantly ( $p=0.0001$ ) decreased *Vmat2*-protein in the brain with a corresponding later over-expression of *Vmat2* coincident with a significant ( $p=0.0016$ ) increase in physical activity. We conclude that Vivo-morpholinos can be a valuable tool in determining causal gene-phenotype relationships in whole animal models.

**Citation:** Ferguson DP, Schmitt EE, Lightfoot JT (2013) Vivo-Morpholinos Induced Transient Knockdown of Physical Activity Related Proteins. PLoS ONE 8(4): e61472. doi:10.1371/journal.pone.0061472

**Editor:** Wei Yan, University of Nevada School of Medicine, United States of America

**Received:** January 25, 2013; **Accepted:** March 13, 2013; **Published:** April 22, 2013

**Copyright:** © 2013 Ferguson, et al. This is an open-access article distributed under the terms of the Creative Commons Attribution License, which permits unrestricted use, distribution, and reproduction in any medium, provided the original author and source are credited.

**Funding:** This project was funded by National Institutes of Health grant AR050085 and start-up funds from the Department of Health and Kinesiology at Texas A&M University. The funders had no role in study design, data collection and analysis, decision to publish, or preparation of the manuscript.

**Competing Interests:** The authors have declared that no competing interests exist.

\* E-mail: davidpferguson13@gmail.com

## Introduction

Physical inactivity has been correlated with cardiovascular disease, obesity, type II diabetes and some types of cancers [1]. With only 3.5% of adults meeting the recommended physical activity guidelines [2], physical inactivity is the second leading actual cause of death (~250,000 cases/year) in the United States [3] with an estimated \$507 billion a year in health care costs [1]. Several potential candidate genes associated with the genetic influence on voluntary physical activity have been identified [1,4,5,6,7,8,9,10,11] with potential regulatory effects both in the brain and skeletal muscle.

Of the candidate genes identified, Dopamine Receptor 1 (*Drd1*; [1,6,7,8,9]), Glucose Transporter 4 [*Glut4*, aka: *Slc2a4*; 11], and Vesicular Monoamine Transporter 2 (*Vmat2*; [4,10,12,13]), have been the most widely studied in association with voluntary physical activity. *Vmat2* is expressed in the brain and skeletal muscle. Studies examining the nucleus accumbens of the brain have shown that *Vmat2* stores dopamine in synaptic vesicles [4,10,12,13]. A loss of *Vmat2* has been associated with a decrease in physical activity and development of Parkinson's disease [10,13]. Another central factor contributing the regulation of physical activity is *Drd1*; high active mice have an under expression of *Drd1* which results in a decrease in dopamine turnover in the nucleus accumbens [6] and a suggested increase in reward driven behavior and voluntary physical activity [6,7]. It has recently been proposed that *Drd1* expression in skeletal muscle could have similar effects on physical

activity with an increase in D1 receptors (*Drd1* and *Drd5*) in skeletal muscle being associated with an increase in muscle force production and prevention of atrophy [8]. An additional mechanism by which peripheral factors could regulate physical activity is through *Glut4*. *Glut4* transports glucose into skeletal muscle [14] and it has been shown that an over expression of *Glut4* is associated with a fourfold increase in voluntary physical activity [11].

Quantitative genetics rarely identify a mechanistic link relating a potential candidate gene to the regulation of a phenotype. To prove causal relationship, transgenic animals with targeted genes knocked-out can be employed. However, a transgenic approach can be confounded by the loss of regulatory regions in the genome as well as developmental issues for the animal [15]. A tool that could transiently silence a specific gene *in vivo* without confounding effects would be ideal in identifying genes that regulate voluntary physical activity and other phenotypes.

Morpholinos are anti-sense oligonucleotide analogs that bind to complementary RNA sequences and inhibit processing of mRNA by blocking translation or splicing of pre-mRNA [16]. While early versions of morpholinos have been in use for over fifteen years with *in vitro* applications, these early morpholino designs presented several problems that prevented use in an *in vivo* model, including rapid degradation by proteases/nucleases [17] and the inability of the morpholino to cross membranes [18]. These problems were solved when Marcos and colleagues [19] altered the delivery

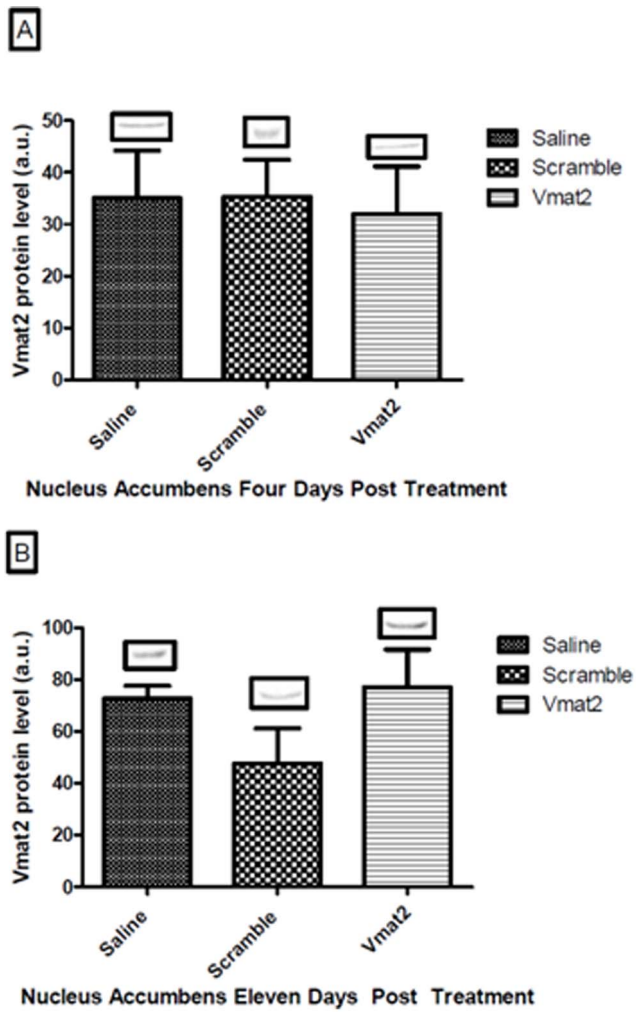

**Figure 1. Experiment 1, Vmat2 protein level in the nucleus accumbens.** Mean  $\pm$  standard deviation of western blot optical band density and a representative western blot comparing Saline, Scramble and Vivo-morpholino treated animals for Vmat2 protein expression in the nucleus accumbens of the brain. There was no difference between the treatment groups at four ( $p=0.87$ , Panel A) or eleven ( $p=0.14$ , Panel B) days post treatment. doi:10.1371/journal.pone.0061472.g001

moiety of morpholinos by using eight guanidinium head groups of arginine-rich peptides. The resulting oligonucleotide analog, termed “Vivo-morpholinos,” are transported into the cell by endocytosis and protected from proteases and nucleases [19]. Recently there has been evidence suggesting protein knockdown can be achieved equally with intravenous (IV), intraperitoneal (IP), or direct injection into targeted tissue [17,18,19,20].

To date there are only twenty-eight studies using Vivo-morpholinos [17,18,19,20,21,22,23,24,25,26,27,28,29,30,31,32,33,34,35,36,37,38,39,40,41,42,43,44] and all have reported at least 50% knockdown of the target gene with no adverse side effects. Fourteen of these studies used a mouse model [17,18,19,20,21,24,31,32,34,35,40,41,42,43] with the remaining studies using rats [36,37], newts [29], chicken embryos [27], fish [15,16,22,23,25,26] tadpoles [30,38], or frogs [28]. In the mouse models, it has been shown that Vivo-morpholinos were equally efficacious with IV or IP, and recent studies have shown success with direct injection in target tissue [36,37]. While these studies have established the use of Vivo-morpholinos, they were limited in the

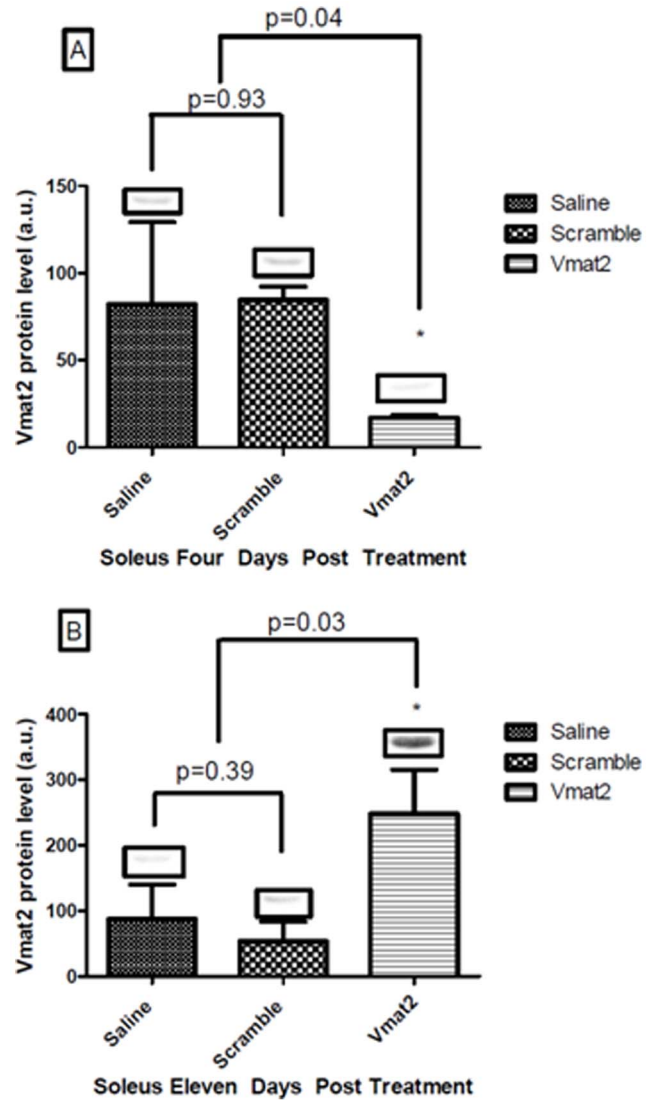

**Figure 2. Experiment 1, Vmat2 protein level in the soleus.** Mean  $\pm$  standard deviation of western blot optical band density and a representative western blot comparing Saline, Scramble and Vivo-morpholino treated animals for Vmat2 protein expression in the soleus. Panel A shows Vmat2 expression at four days post-last injection. There was a significant decrease ( $p=0.04$ ) in Vivo-morpholino treated animals compared to Saline and Scramble treated animals in Vmat2 expression at four days post injection. Panel B shows Vmat2 expression at eleven days post-last injection. There was a significant increase ( $p=0.03$ ) in Vivo-morpholino treated animals compared to Saline and Scramble treated animals in Vmat2 expression at eleven days post injection. doi:10.1371/journal.pone.0061472.g002

application parameters used. One of the major limitations of the initial validation studies was the short-term nature of the studies (e.g. 24–48 hours post treatment) even though it has been suggested [19] that gene silencing with Vivo-morpholinos will theoretically last much longer (e.g. 7 days). Further, the existing Vivo-morpholino studies have only evaluated effects of a single Vivo-morpholino without indication of whether multiple genes can be silenced simultaneously. Additionally, there has been little success in applying Vivo-morpholinos to the mouse brain [19].

Therefore, the purpose of this study was to validate the use of Vivo-morpholinos in silencing targeted genes in a mouse model of voluntary physical activity. This study included evaluation of the

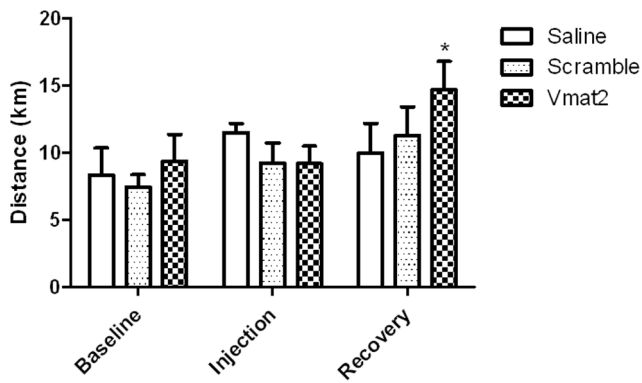

**Figure 3. Experiment 1, mouse wheel running.** Average daily distance ran for the baseline, injection, and recovery week for animals treated with saline, Vivo-morpholino vehicle only (scramble) and the Vivo-morpholino targeting *Vmat2* (*Vmat2*). *Vmat2* group significantly (\* $p=0.001$ ) increased activity in the recovery week compared to the baseline and injection week. There was no difference in physical activity ( $p>0.05$ ) in the scramble or saline treated animals for baseline, injection, and recovery weeks.  
doi:10.1371/journal.pone.0061472.g003

appropriate control, the effectiveness of transporting a Vivo-morpholino across the blood brain barrier (BBB) with a pharmacological aid, the ability to combine multiple Vivo-morpholinos in a “cocktail” to silence multiple genes simultaneously, and whether daily physical activity altered the washout time course of an intravenously injected Vivo-morpholino.

## Methods

Three separate experiments were used to fulfill the purposes of this project. All experiments were approved by the Texas A&M Institutional Animal Care and Use Committee (Animal use protocols 2010-256, 2010-187, 2011-140, and 2011-147) and all animals were housed in an AAALAC certified vivarium on a 12-hour light/dark cycle with *ad libitum* access to standard chow and water. Animals were monitored and efforts were taken to ameliorate any animal suffering. All experiments used Vivo-morpholinos ordered in the 400-nmole batches.

### • Experiment 1: Evaluation of Vivo-morpholinos’ gene silencing in mouse activity model

This experiment evaluated the effectiveness of silencing genes in a physical activity model using Vivo-morpholinos, a method of Vivo-morpholino delivery across the BBB, as well as the appropriate control vehicle. Eighteen male C57Bl/6J mice (Jackson Labs, Bar Harbor, ME) were randomly assigned to one of three treatment groups:

Group 1) intravenously injected a translation-blocking Vivo-morpholino (11 mg/kg) [19]; Gene Tools LLC, Philomath, OR) targeting *Vmat2* (**Vmat2** group,  $n=6$ );

Group 2) Intravenously injected a Vivo-morpholino scramble control (11 mg/kg) which consisted of vehicle plus an oligonucleotide target (5'-CCTCTTACCTCAGTTACAATTTATA-3') that did not correspond to murine mRNA (**Scramble** group,  $n=6$ ); and

Group 3) An intravenously injected control group that received an equal volume (110  $\mu$ l) of physiological saline (**Saline** group,  $n=6$ ).

Preliminary experiments determined that systemically delivered Vivo-morpholinos did not knockdown brain proteins [45]. Thus,

to facilitate Vivo-morpholino transport across the BBB, all treatment groups received the bradykinin analog RMP-7 (6.5  $\mu$ g/kg; Bachem, Prussia, PA) [46]. Pharmacological studies have shown that using endogenous analogs of bradykinin [47] increase permeability of the BBB while maintaining physiological function of the animal [46]. Bradykinin activates  $\beta_2$  receptors on endothelial cells of cerebral capillaries thereby disengaging tight junctions and causing an increase in permeability of cerebral blood vessels [46,47]. RMP-7 is a bradykinin analog that has several benefits over bradykinin; specifically RMP-7 resists degradation, has little to no toxicity to the brain, can be administered intravenously, and is fast acting producing a result within 60 seconds of administration [47]. RMP-7 was initially developed as a delivery method for chemotherapeutics in brain glioma patients with studies showing a linear dose response between RMP-7 and BBB permeability in conjunction with a variety of chemotherapeutics [46].

At eight weeks of age mice were individually housed with running wheels equipped with computers (Sigma Sport, St. Charles, IL) to measure average daily distance run [48], and beginning at nine weeks of age, completed a week of baseline wheel running. At ten weeks of age, mice were randomly assigned to one of the three treatment groups and received a tail vein injection of the specific treatment for three consecutive days. At 11 weeks of age (4 days post the last injection) half the cohort was sacrificed ( $n=3$  per treatment group). The activity of the remaining mice was monitored for an additional week (recovery) and the mice were then sacrificed.

At sacrifice, mice were anesthetized using vaporized isoflurane followed by cervical dislocation. The soleus (peripheral slow twitch muscle) and nucleus accumbens (reward center of the brain) were removed and flash-frozen for later analysis. Gene silencing was evaluated by determining protein knockdown using standard SDS-Page and Western blotting techniques. Briefly, proteins were extracted by placing the tissue in lysis buffer and homogenizing the tissue with a motor and pestle. Protein concentration was determined by Bradford assay to ensure equal amount of protein loading per sample on the gel. The proteins were separated by SDS-Page, and then transferred to a nitrocellulose membrane with transfer confirmed by *Ponceau S* stain. Membranes were incubated overnight in 1:1000 ratio of primary antibody recognizing *Vmat2* (Cell Applications, San Diego, CA) and blocking buffer (5% Nonfat Dried Milk, 0.5% Tween 20). Membranes were then incubated in the secondary horseradish peroxidase antibody (Cell Signaling Technology, Beverly, MA). Chemiluminescence was imaged with a Flurochem analyzer (Derbyshire, UK) and the blot was analyzed using the individual protein band’s optical density that allowed for a semi-quantitative estimate of protein knockdown.

The Western blot optical densities were analyzed using one-way ANOVA to compare *Vmat2* protein expression between the treatments with an *a priori* alpha level of 0.05. Activity data was analyzed using a 3 $\times$ 3 ANOVA with the main effects being treatment group (i.e. **Vmat2**, **Saline**, or **Scramble**) and week of treatment (i.e. baseline, injection, or recovery). If there was a significant main-effect, a Tukey’s HSD *post hoc* ( $p<0.05$ ) test was employed. All statistical tests were carried out using GraphPad Prism 5 (GraphPad Software Inc, La Jolla, CA).

### • Experiment 2: Determination of Vivo-morpholino Washout Period

To evaluate if physical activity altered the efficacy of the Vivo-morpholino, 24 eight week old C57Bl/6J male mice (Jackson Labs, Bar Harbor, ME) were individually housed and randomly assigned

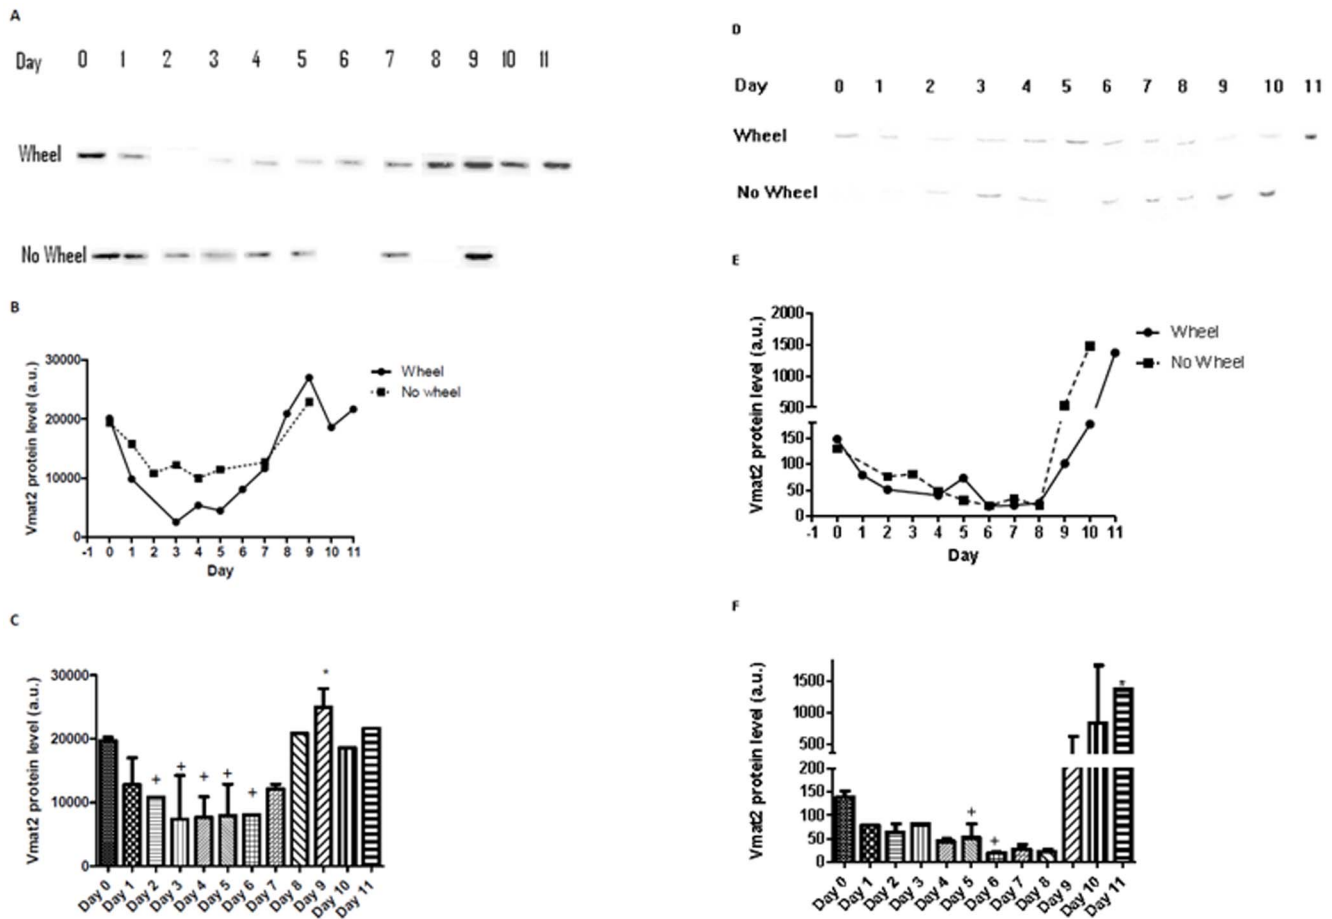

**Figure 4. Experiment 2, Evaluation of the washout time course of Vivo-morpholinos targeting *Vmat2*.** Panels A, B, and C represent soleus samples while panels D, E, and F represent nucleus accumbens samples. Panel A represents western blot data probing for *Vmat2* in the soleus for both unlocked wheel and locked wheel groups. Panel B is the optical density of the individual western blot bands from panel A. A nonlinear regression was run on the data in panel B which generated an  $R^2=0.65$  for the animals on unlocked wheels and an  $R^2=0.55$  for animals on locked wheels. Given there was no difference ( $p=0.42$ ) in the slope or y intercept of the unlocked wheel and locked wheel groups, the data were pooled at each Day (Panel C). Panel C shows that there was a significant knockdown ( $p=0.001$ ) in *Vmat2* on days 2–6 and a significant ( $p=0.001$ ) over expression in *Vmat2* on day 9 in the soleus. The same methodologies were applied to Panels D, E, and F for the nucleus accumbens. The nonlinear regression resulted in  $R^2=0.99$  for the unlocked wheel group and  $R^2=0.99$  for the locked wheel group, and there was no difference ( $p=0.66$ ) in the slope and y intercepts of the lines in panel E. Additionally *Vmat2* was only significantly knocked down on Days 5 and 6 ( $p=0.001$ ) with a significant over expression ( $p=0.001$ ) on Day 11. The mouse in the locked wheel group representing data for Day 11 was removed from analysis because it developed malocclusion in the front incisors and became malnourished, thus altering physical activity level.  
doi:10.1371/journal.pone.0061472.g004

to either a running wheel group ( $n=12$ ; unlocked wheels) or a fixed wheel group ( $n=12$ ; locked wheels). The running wheel group had free moving wheels attached to a computer as described in Experiment 1. Each mouse in the fixed running wheel group had a running wheel that was secured to prevent wheel movement. Beginning at nine weeks of age, daily distance was measured in the running wheel group using methods from Experiment 1. At ten weeks of age one mouse from each group was sacrificed to establish a baseline level of *Vmat2* protein expression, while the remaining mice received a concurrent tail vein injection of RMP-7 (6.5  $\mu\text{g}/\text{Kg}$ ) [46] and a Vivo-morpholino targeting *Vmat2* (11  $\text{mg}/\text{Kg}$ ) [19] for three consecutive days. Each day thereafter, one mouse was sacrificed from each group to determine the washout of the Vivo-morpholino and whether exposure to activity affected protein knockdown.

On the day of sacrifice, mice were euthanized using vaporized isoflurane and cervical dislocation, with subsequent harvesting of the soleus and nucleus accumbens. Afterwards, proteins were

extracted from each sample and *Vmat2* expression, as well as  $\alpha$ -synuclein (Cell Signaling, Danvers, MA), which has been shown to be an indicator of *Vmat2* transcription [49] were determined using Western Blot techniques described in Experiment 1. The washout data was then analyzed for linearity and if nonlinear, nonlinear regression approaches were used to obtain  $R^2$  values for the washout curves. The nonlinear data was then log transformed to meet the parameters of a linear regression, which allowed the comparison of the regression parameters between the locked and unlocked running wheel groups. A  $p$  value of 0.05 was set *a priori* to determine if the slopes and y intercepts were different from each other. If there were no differences between the locked and unlocked wheel groups, the data points were pooled. To facilitate the comparison of baseline physical activity across the treatment protocol, average daily distance measurements were pooled in animals sacrificed in days 1–5 and days 6–10 of the protocol and compared using a one-way ANOVA (*a priori* alpha value = 0.05).

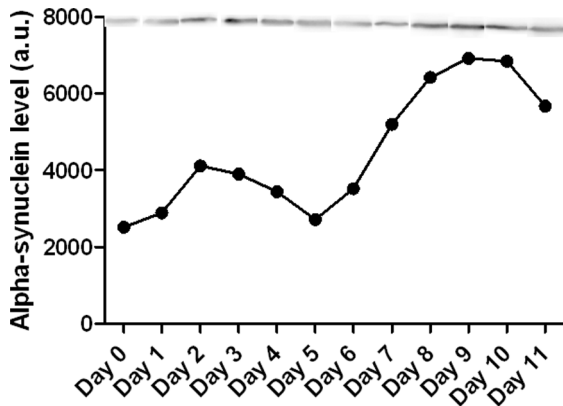

**Figure 5. Experiment 2,  $\alpha$ -synuclein protein level in nucleus accumbens.** Western blot analysis probing for  $\alpha$ -synuclein to confirm the signal for the over expression of *Vmat2* protein seen in the nucleus accumbens. There was an increase in  $\alpha$ -synuclein at days 2 and 7–10.  $\alpha$ -synuclein is an indicator of *Vmat2* transcription thus when *Vmat2* was knocked down by the *Vivo*-morpholino there was an increased stimulus placed on the cell to transcribe more *Vmat2*.  
doi:10.1371/journal.pone.0061472.g005

#### • Experiment 3: Utilization of a *Vivo*-morpholino Cocktail

Twelve, eight-week old male C57Bl/6J mice (Jackson Labs, Bar Harbor, ME) were individually housed with running wheels as described in Experiment 1 to measure average daily distance run. At nine weeks of age mice completed a week of baseline wheel running and then at ten weeks of age, randomly received a tail vein injection of either the *Vivo*-morpholino cocktail ( $n = 6$ ) containing a *Vivo*-morpholino targeting *Drd1* (11 mg/kg) [19] and another *Vivo*-morpholino targeting *Glut4* (11 mg/kg) [19] or physiological saline ( $n = 6$ ) for three consecutive days. Physiological saline was used as a control since Experiment 1 showed no difference in the activity response of physiological saline and *Vivo*-morpholino scrambled control (see Results). At 11 weeks of age (four days post-last injection), half the cohort was sacrificed to evaluate the initial protein knockdown efficacy of the *Vivo*-morpholino cocktail. The remaining mice ran for one week and were then sacrificed. Upon sacrifice, the soleus was harvested and protein expression of *Drd1* (Cell Applications, San Diego, CA) and *Glut4* (Cell Applications, San Diego, CA) as well as the potential compensatory proteins dopamine receptor 5 (*Drd5*, Proteintech Group Inc, Chicago, IL) and glucose transporter 1 (*Glut1*, Cell Applications, San Diego, CA) were determined using standard Western blotting techniques, as described in Experiment 1. Similar statistical analysis was used as in Experiment 1 with the exception of a  $2 \times 3$  ANOVA with the main effects being treatment (Saline or *Vivo*-morpholino cocktail) and treatment week (Baseline, Injection, or Recovery).

## Results

#### • Experiment 1: Evaluation of *Vivo*-morpholinos in activity model

In the brain, treatment with a *Vivo*-morpholino targeting *Vmat2* did not result in a significant knockdown of *Vmat2* expression in the nucleus accumbens of the brain four days after the last morpholino injection as compared to saline or scramble treatment (Figure 1, Panel A). However, there was a 79% knockdown ( $p = 0.04$ ) of *Vmat2* in the soleus four days post-injection as compared to both saline and scramble (Figure 2, Panel A). Surprisingly, during the recovery week (11 days post treatment)

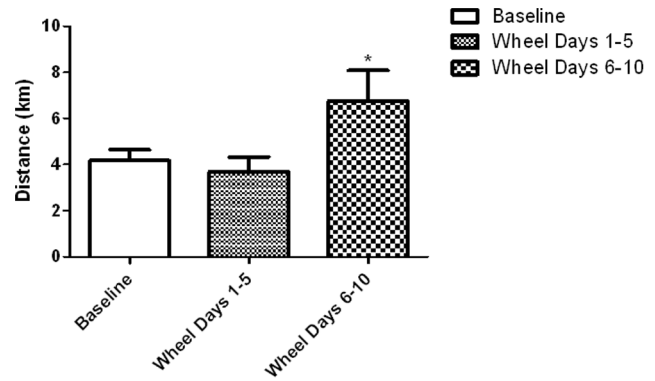

**Figure 6. Experiment 2, mouse wheel running.** Average daily distance ran for animals treated with *Vivo*-morpholino targeting *Vmat2* for the baseline week, injection week (Days 1–5), and recovery week (Days 6–10) of washout protocol. Physical activity was significantly ( $*p = 0.0016$ ) increased in Days 6–10.  
doi:10.1371/journal.pone.0061472.g006

*Vmat2* protein level had a significant 354% over expression in the soleus of the ***Vmat2***-*Vivo*-morpholino group compared to the saline and scramble treatment (Figure 2, Panel B,  $p = 0.03$ ). In the nucleus accumbens (Figure 1) and the soleus (Figure 2) there was no difference in *Vmat2* expression between saline and scramble treatments.

The initial reduction of *Vmat2* in the soleus did not affect daily physical activity (Figure 3). However, the ***Vmat2*** group had a significant 139% increase in activity during the recovery week as compared to the baseline and injection week (Figure 3,  $p = 0.001$ ), which corresponded to the *Vmat2* over-expression observed in the soleus eleven days post-injection (Figure 2, Panel B).

#### • Experiment 2: Determination of *Vivo*-morpholino Washout Period

The evaluation of the washout time course of *Vivo*-morpholinos targeting *Vmat2* showed there was a significant ( $p = 0.001$ ) 55% knockdown of *Vmat2* in the soleus on Days 2–6 (Figure 4 Panels A and C) with a significant 129% over expression observed on Day 9 ( $p = 0.001$ ). There was no difference ( $p = 0.74$ ) between the washout curves for the animals who had access to a running wheel ( $R^2 = 0.65$ ) compared to those that had a locked running wheel ( $R^2 = 0.55$ ) (Figure 4 Panel B).

In the nucleus accumbens, there were similar observations as in the soleus. There was a significant 74% knockdown in *Vmat2* (Figure 4 Panels D and F) on Days 5–6 ( $p = 0.001$ ) with a 988% over expression on Day 11 ( $p = 0.001$ ). Additionally there was no difference in the washout curves ( $p = 0.66$ ) for animals on wheels ( $R^2 = 0.99$ ) or locked wheels ( $R^2 = 0.99$ ) (Figure 4 Panel E).

To confirm the over expression of *Vmat2*, western blot analysis was performed probing for  $\alpha$ -synuclein, which is an indicator of *Vmat2* transcription [49]. The results showed that in the brain on Days 2 and 7 there was a 275% increase  $\alpha$ -synuclein protein level (Figure 5).

There was no difference ( $p > 0.05$ ) in physical activity level of the running wheel group between the baseline week and days 1–5 post-injection (Figure 6). During days 6–10 of the washout protocol there was a significant 164% increase in physical activity ( $p = 0.0016$ ) versus baseline and days 1–5, corresponding to the increase in *Vmat2* expression during the same time period (Figure 4).

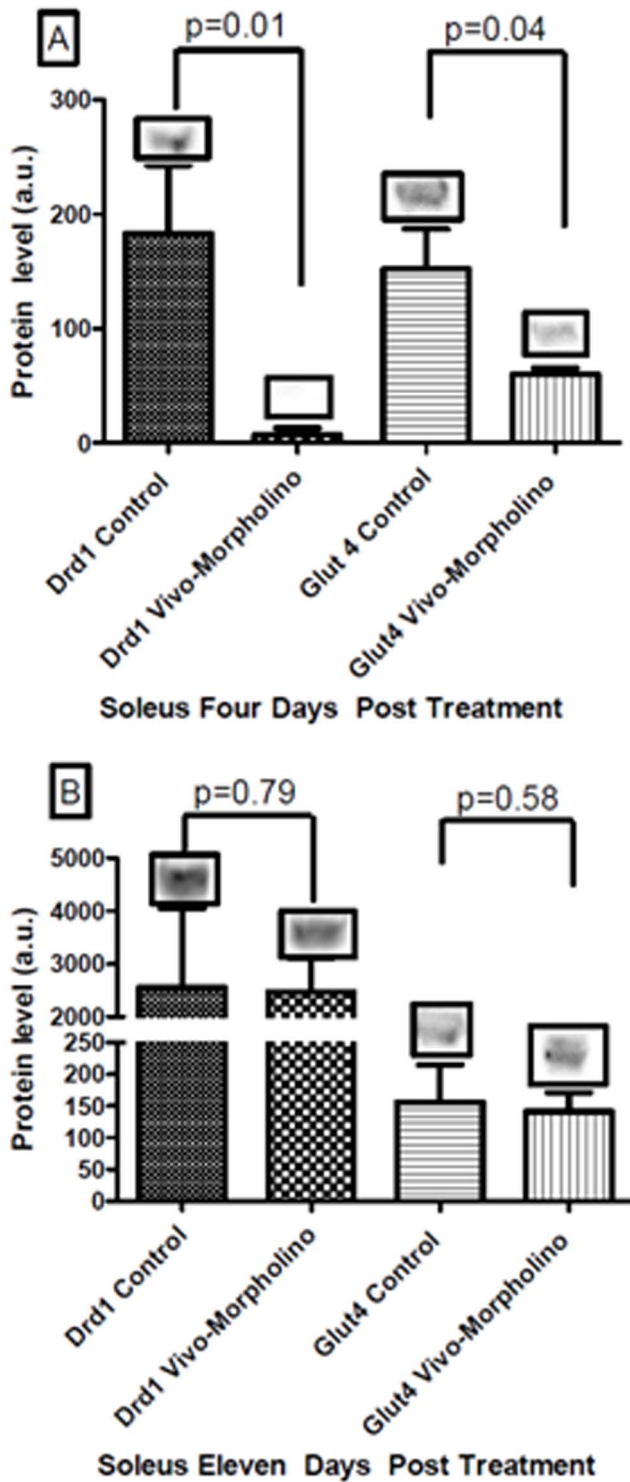

**Figure 7. Experiment 3, Drd1 and Glut4 protein level.** Western blot and mean  $\pm$  standard deviation of optical densities of soleus tissue that underwent the Vivo-morpholino cocktail treatment. Panel A represents four days post treatment of Drd1 and Glut4 expression comparing controls to Vivo-morpholino cocktail treated animals. There was a significant knockdown for both Drd1 ( $p=0.01$ ) and Glut4 ( $p=0.04$ ). Panel B represents eleven days post treatment of Vivo-morpholino cocktail. There was no difference between control and Drd1 ( $p=0.79$ ) and Glut4 ( $p=0.58$ ) expression. doi:10.1371/journal.pone.0061472.g007

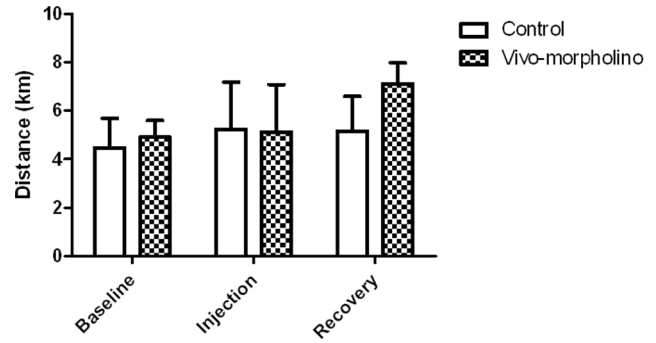

**Figure 8. Experiment 3, mouse wheel running.** Average daily distance ran for baseline, injection, and recovery week for animals treated saline (control) and the morpholino cocktail targeting Drd1 and Glut4 (Vivo-morpholino). There was no difference ( $p=0.15$ ) between the activity of the control group and the morpholino group. doi:10.1371/journal.pone.0061472.g008

• Experiment 3: Utilization of a Vivo-morpholino Cocktail

Western blot analysis showed that there was significant knockdown in Drd1 (97%) protein (Figure 7, Panel A,  $p=0.01$ ) and Glut4 (60%) protein (Figure 7, Panel A,  $p=0.042$ ) in the soleus four days after the last injection. Expression of both Drd1 and Glut4 returned to control levels during the recovery week (11 days post injection, Figure 7, Panel B). With the Vivo-morpholino cocktail treatment (*Drd1* and *Glut4*) there was no change in physical activity at any time period (Figure 8,  $p=0.15$ ).

To evaluate potential compensation for the decreases in Drd1 and Glut4, Drd5 and Glut1 were probed by western blotting (Figure 9). There was no difference in Drd5 protein levels between control and treatment at four days post treatment ( $p=0.22$ ) or eleven days post treatment ( $p=0.93$ ). There was also no difference in Glut1 protein levels between control and treatment at four days post treatment ( $p=0.56$ ) or eleven days post treatment ( $p=0.36$ ).

**Discussion**

A molecular biology tool that can transiently silence genes in a whole-animal model will significantly advance the capability to determine cause-effect relationships between specific genes and targeted phenotypes. We have found that the use of Vivo-morpholinos targeting *Vmat2*, *Drd1*, and *Glut4* resulted in transient protein knock-down in the skeletal muscle up to four days after the last application. While the use of a pharmacological agent to facilitate Vivo-morpholino delivery across the blood brain barrier seemed promising, our results indicate marginal knockdown in the brain as compared to the soleus when using RMP-7. Further, we observed that concurrent physical activity did not influence the action of Vivo-morpholinos on *Vmat2* protein expression. Maybe most importantly, we also observed that the use of multiple Vivo-morpholinos in a cocktail would knock down more than one protein at a time in skeletal muscle. Interestingly, while initial knockdown of these proteins did not affect physical activity, we observed an increased physical activity coincident with post-washout over-expression of *Vmat2*.

The search for an *in vivo* technique to transiently silence genes has been pursued for several decades with numerous promising tools identified including antisense oligonucleotides, small interfering RNA (siRNA), and phosphorodiamidate morpholino oligomers (PMO). Antisense oligonucleotides are effective at gene silencing yet are highly unstable in body fluids and are rapidly degraded [17]. Initially, siRNA promised to transiently silence genes but presented difficulty with *in vivo* applications [44], which

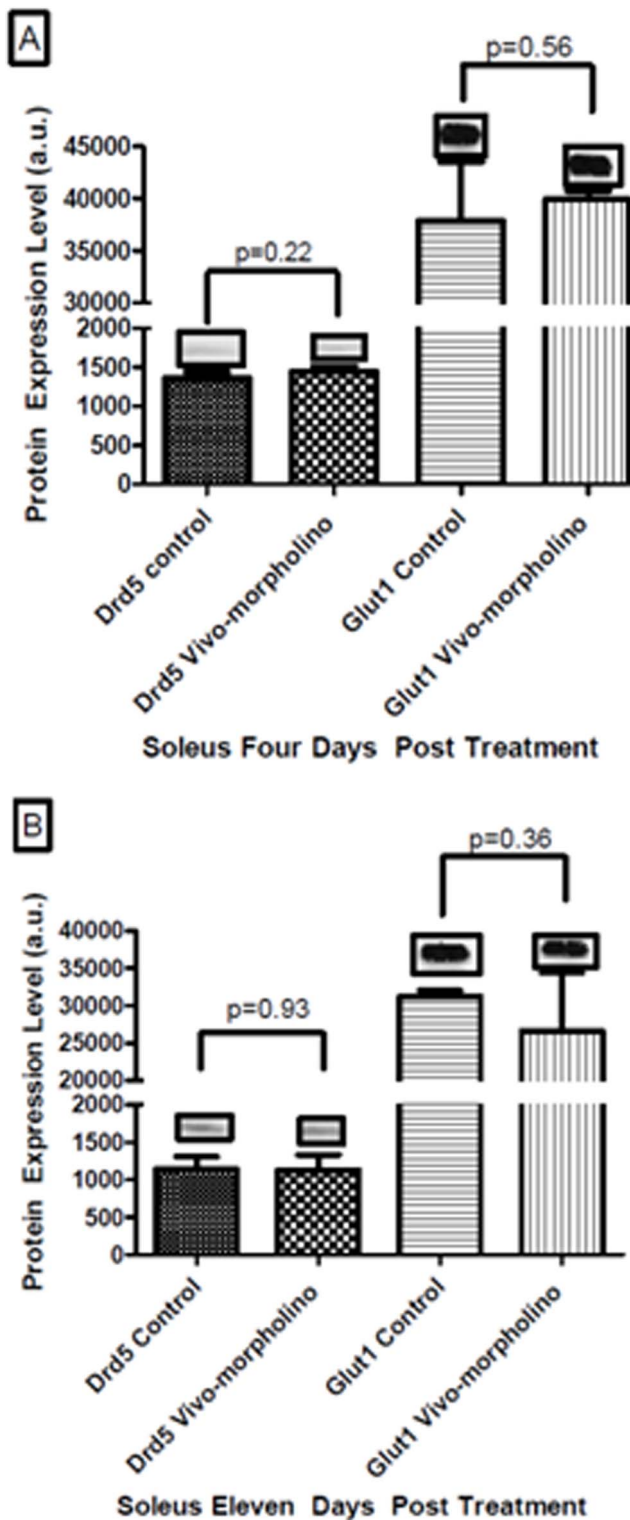

**Figure 9. Experiment 3, Drd5 and Glut1 protein level.** Western blot and mean  $\pm$  standard deviation of optical densities of soleus tissue that underwent the Vivo-morpholino cocktail treatment. Panel A represents four days post treatment of Drd5 and Glut1 protein expression comparing controls to Vivo-morpholino cocktail treated animals. There was not a significant knockdown for either Drd5 ( $p=0.22$ ) or Glut1 ( $p=0.56$ ). Panel B represents eleven days post treatment of Vivo-morpholino cocktail. There was no difference between control and Drd5 ( $p=0.93$ ) and Glut1 ( $p=0.36$ ) expression. doi:10.1371/journal.pone.0061472.g009

has limited siRNA's usefulness in integrative physiology. PMOs resist degradation *in vivo* yet have been associated with increased toxicity [17]. Morpholinos, which are a form of antisense oligonucleotides, have had several modifications to their structure to limit toxicity and improve gene silencing which led to the development of the more stable Vivo-morpholino [19]. Additionally, the fact that we observed no change in daily physical activity with the vivo-morpholino delivery vehicle (scramble) makes the Vivo-morpholino ideal for the investigation of candidate genes associated with physical activity.

Our results showed that *Drd1*-, *Glut4*-, and *Vmat2*-targeted Vivo-morpholinos significantly knocked down *Drd1*, *Glut4*, and *Vmat2* protein expression in skeletal muscle by an average 97%, 60%, and 79%, respectively. Furthermore, the use of the Vivo-morpholino cocktail showed that simultaneous protein knockdown was possible. Previous studies have shown that treatment with Vivo-morpholinos at a similar dosage as used in this study (i.e. 11 mg/kg) resulted in 50–70% knockdown [16,26], similar to the knockdown amounts we observed. Recent literature [43] suggests that to obtain 100% protein knockdown, the Vivo-morpholino dosage must be 160% greater than the amount prescribed by the manufacturer (i.e. 17.6 mg/kg) or the Vivo-morpholino injections must be given regularly over the course of the study [17,20]. The fact that there were differences in the magnitude of *Drd1* and *Glut4* knockdown suggests that the nature of the target gene also may play a role in the magnitude of gene silencing. Genes coding for proteins that exhibit faster turnover rates in skeletal muscle may require the higher Vivo-morpholino dose. Therefore, protein turnover characteristics should be considered as a design parameter in Vivo-morpholino protocols.

Our initial results with Vivo-morpholinos in brain tissue were not promising due to a potential lack of BBB penetration [45]. Vivo-morpholinos are  $\sim 10,000$  Daltons in size and the BBB prevents substances greater than 400 Daltons from reaching the brain [46], thus we utilized RMP-7 as means to facilitate Vivo-morpholino delivery across the BBB. Unfortunately, in spite of the potential benefits of using RMP-7, Experiment 1 did not show significant knockdown in the nucleus accumbens of *Vmat2* protein when using RMP-7 on day four after the injection. Interestingly, we did observe *Vmat2* knockdown in the nucleus accumbens in Experiment 2 on Days 5 and 6 after the last injection, which was outside of our measurement range in Experiment 1. We suspect that due to the high activity of the dopamine system in the brain [50,51,52], there may be a decreased protein turnover rate of *Vmat2* in the brain as compared to skeletal muscle [50,53,54,55] resulting in a slower protein turnover rate leading to a slower knockdown time course of *Vmat2* in the brain. Thus, while the use of RMP-7 appears to have facilitated some knockdown of *Vmat2* in the brain, knockdown of brain genes using vivo-morpholinos needs to be carefully designed to optimize both knock-down magnitude and time-course.

Surprisingly, in both Experiments 1 and 2, we observed a rebound over expression of *Vmat2* protein compared to baseline during the recovery week in both skeletal muscle and nucleus accumbens. To our knowledge, this rebound phenomena has not been reported in the Vivo-morpholino literature. We would suggest that this rebound over-expression was actually the result of the feedback loop that controls *Vmat2* [55]. Speculatively, with the blocking of *Vmat2* mRNA and a reduction of *Vmat2* protein concentration, the cell would have been stimulated to transcribe more *Vmat2*. With subsequent *Vmat2* production being blocked by the Vivo-morpholino, the stimulus to produce more *Vmat2* mRNA would become further elevated compared to the initial days of treatment. Once the Vivo-morpholino was degraded and

removed, the elevated signal to produce Vmat2 would result in an increased translation of *Vmat2* mRNA [55] and over-expression of Vmat2 protein. This hypothesis is supported by our observation of a significant increase in  $\alpha$ -synuclein in the nucleus accumbens on Day 2, with a continued increased signaling from Day 7 and peaking on Day 10 (Figure 5). Whereas  $\alpha$ -synuclein has been observed to be an indicator of the cell's stimulus to transcribe *Vmat2* [49], it appears that once Vmat2 was knocked down there was an increase in the stimulus to transcribe *Vmat2* which resulted in the over expression of Vmat2 in the recovery week. While we did not observe a rebound over expression with either of the other genes we investigated (*Drd1* and *Glut4*), the possibility of such a rebound effect occurring with other genes is potentially an intriguing way to use Vivo-morpholinos to explore consequences of both gene under expression and over expression in the same model.

It has been previously suggested that *Drd1*, *Glut4*, and *Vmat2* are potential candidate genes for the regulation of physical activity [1,6,7,8,10,13] with *Glut4* in particular, showing a direct effect on activity when over expressed [11]. Thus, we were somewhat surprised that knockdown of both *Drd1* and *Glut4* simultaneously in soleus (Experiment 3) did not affect activity levels. However, our observed lack of effect of *Glut4* and *Drd1* knockdown on physical activity in spite of an observed 60% and 97% protein reduction, respectively, could have reflected a general redundancy in these physiological systems. For example, it has been shown that with a 50% reduction in *Glut4* there is no apparent change in muscle physiology because of a compensatory *Glut1* over-expression for the loss of *Glut4* [56,57]. Therefore, we evaluated possible compensation in these two systems by analyzing *Drd5* and *Glut1* protein levels. We observed no differences in *Drd5* or *Glut1* levels between control and treatment groups suggesting that compensation for the knock down of *Glut4* or *Drd1* did not occur and therefore, neither *Glut4* nor *Drd1* are primary peripheral regulating genes in voluntary activity. However, in spite of these results, it is clear that future studies can take advantage of the use of vivo-morpholino cocktails to silence multiple genes at once to consider their phenotypic effects.

*Vmat2* was an attractive knockdown target for the regulation of physical activity given its proven role in the development of Parkinson disease [10]. However, we observed no change in activity with a decrease in peripheral *Vmat2* in Experiments 1 and 2. However, the rebound of *Vmat2* observed in the soleus (Experiment 1 and 2) and nucleus accumbens (Experiment 2) along with the associated increase in physical activity could provide a potential explanation for the regulation of voluntary physical activity. It has been shown that the dopamine system in

skeletal muscle affects muscle force production [8] and in the brain affects reward driven behavior [6]. When mice are given, artificial dopamine there is an associated hyperactivity response [50,51,54,58]. We would suggest that as the effects of the Vivo-morpholinos wore off and *Vmat2* expression returned and surpassed baseline, there was an increase in extracellular dopamine that elicited the hyperactive effects similar to artificially administering dopamine. Further, this extracellular dopamine would have increased skeletal muscle tone and force production [8,59] as well as reward driven behavior [6], which would have further increased physical activity.

The purpose of these experiments was to evaluate the efficacy of a potential transient gene-silencing tool, the Vivo-morpholino, when used in a physical activity model for an extended period of time. We observed that Vivo-morpholinos that targeted *Vmat2*, *Drd1* or *Glut4* significantly reduced associated protein expression in skeletal muscle up to four days after treatment with a subsequent recovery to baseline levels in *Drd1* and *Glut4* and with an over expression in *Vmat2*. Physical activity during the treatment did not affect the time course of protein knockdown. The delivery vehicle used (scramble Vivo-morpholino) did not affect protein knockdown or physical activity. Further, we found that multiple Vivo-morpholinos given in a cocktail knocked down multiple proteins simultaneously. While knocking-down any of the targeted genes did not result in hypothesized reductions in physical activity, a rebound of *Vmat2* protein was associated with an increase in physical activity during the same time as the rebound. We conclude that the use of Vivo-morpholinos can be a powerful tool to transiently silence specific genes and determine whether those genes are causally related to a phenotype of interest, especially when the targeted gene's protein characteristics, such as turnover rate and location, are used to strengthen the research design.

## Acknowledgments

The authors wish to thank Sheril Marek, Heather Vellers, Analisa Jimenez, and Greesma Shenoy of the Biology of Physical Activity lab at Texas A&M University for their help and support in carrying out this study. Additionally the authors wish to thank Kevin Shimkus, Dr. Michael Wiggs (now at University of Florida), and Dr. Jim Fluckey of the Muscle Biology Lab at Texas A&M University for suggestions regarding the lysis of brain tissue and the use of the Fluorochem equipment and software.

## Author Contributions

Conceived and designed the experiments: DF ES TL. Performed the experiments: DF ES. Analyzed the data: DF TL. Contributed reagents/materials/analysis tools: DF ES. Wrote the paper: DF ES TL.

## References

- Lightfoot JT (2011) Current understanding of the genetic basis for physical activity. *J Nutr* 141: 526–530.
- Troiano RP, Berrigan D, Dodd KW, Mâsse LC, Tilert T, et al. (2008) Physical activity in the United States measured by accelerometer. *Med Sci Sports Exerc* 40: 181–188.
- Mokdad A, Marks J, Stroup D, Gerberding J (2000) Actual causes of death in the United States, 2000. *JAMA* 291: 1238–1245.
- Boger HA, Mannangatti P, Samuvel DJ, Saylor AJ, Bender TS, et al. (2011) Effects of brain-derived neurotrophic factor on dopaminergic function and motor behavior during aging. *Genes Brain Behav* 10: 186–198.
- Egaña LA, Cuevas RA, Baust TB, Parra LA, Leak RK, et al. (2009) Physical and functional interaction between the dopamine transporter and the synaptic vesicle protein synaptogyrin-3. *J Neurosci* 29: 4592–4604.
- Knab AM, Bowen RS, Hamilton AT, Gullledge AA, Lightfoot JT (2009) Altered dopaminergic profiles: implications for the regulation of voluntary physical activity. *Behav Brain Res* 204: 147–152.
- Knab AM, Lightfoot JT (2010) Does the difference between physically active and couch potato lie in the dopamine system? *Int J Biol Sci* 6: 133–150.
- Reichart DL, Hinkle RT, Lefever FR, Dolan ET, Dietrich JA, et al. (2011) Activation of the dopamine 1 and dopamine 5 receptors increase skeletal muscle mass and force production under non-atrophying and atrophying conditions. *BMC Musculoskelet Disord* 12: 27.
- Sartor GC, Aston-Jones GS (2012) A septal-hypothalamic pathway drives orexin neurons, which is necessary for conditioned cocaine preference. *J Neurosci* 32: 4623–4631.
- Taylor TN, Caudle WM, Shepherd KR, Noorian A, Jackson CR, et al. (2009) Nonmotor symptoms of Parkinson's disease revealed in an animal model with reduced monoamine storage capacity. *J Neurosci* 29: 8103–8113.
- Tsao TS, Li J, Chang KS, Stenbit AE, Galuska D, et al. (2001) Metabolic adaptations in skeletal muscle overexpressing GLUT4: effects on muscle and physical activity. *FASEB J* 15: 958–969.
- Russell VA, Sagvolden T, Johansen EB (2005) Animal models of attention-deficit hyperactivity disorder. *Behav Brain Funct* 1: 9.
- Taylor TN, Caudle WM, Miller GW (2011) VMAT2-Deficient Mice Display Nigral and Extranigral Pathology and Motor and Nonmotor Symptoms of Parkinson's Disease. *Parkinsons Dis* 2011: 124165.



14. Bienso RS, Ringholm S, Küllerich K, Aachmann-Andersen NJ, Krogh-Madsen R, et al. (2012) GLUT4 and Glycogen Synthase Are Key Players in Bed Rest-Induced Insulin Resistance. *Diabetes* 61(5): 1090–1099.
15. Osokine I, Hsu R, Loeb GB, McManus MT (2008) Unintentional miRNA ablation is a risk factor in gene knockout studies: a short report. *PLoS Genet* 4: e34.
16. Notch EG, Shaw JR, Coutermarsh BA, Dzioba M, Stanton BA (2011) Morpholino gene knockdown in adult *Fundulus heteroclitus*: role of SGK1 in seawater acclimation. *PLoS One* 6: e29462.
17. Wu B, Benrashid E, Lu P, Cloer C, Zillmer A, et al. (2011) Targeted skipping of human dystrophin exons in transgenic mouse model systemically for antisense drug development. *PLoS One* 6: e29462.
18. Nazmi A, Dutta K, Basu A (2010) Antiviral and neuroprotective role of octaguanidinium dendrimer-conjugated morpholino oligomers in Japanese encephalitis. *PLoS Negl Trop Dis* 4: e892.
19. Morcos PA, Li Y, Jiang S (2008) Vivo-Morpholinos: a non-peptide transporter delivers Morpholinos into a wide array of mouse tissues. *Biotechniques* 45: 613–614, 616, 618 passim.
20. Wu B, Li Y, Morcos PA, Doran TJ, Lu P, et al. (2009) Octa-guanidine morpholino restores dystrophin expression in cardiac and skeletal muscles and ameliorates pathology in dystrophic mdx mice. *Mol Ther* 17: 864–871.
21. Azoitei N, Pusapati GV, Kleger A, Möller P, Küfer R, et al. (2010) Protein kinase D2 is a crucial regulator of tumour cell-endothelial cell communication in gastrointestinal tumours. *Gut* 59: 1316–1330.
22. Carrillo M, Kim S, Rajpurohit SK, Kulkarni V, Jagadeeswaran P (2010) Zebrafish von Willebrand factor. *Blood Cells Mol Dis* 45: 326–333.
23. Guo Y, Ma L, Cristofanilli M, Hart RP, Hao A, et al. (2011) Transcription factor Sox11b is involved in spinal cord regeneration in adult zebrafish. *Neuroscience* 172: 329–341.
24. Kang JK, Malerba A, Popplewell L, Foster K, Dickson G (2011) Antisense-induced myostatin exon skipping leads to muscle hypertrophy in mice following octa-guanidine morpholino oligomer treatment. *Mol Ther* 19: 159–164.
25. Kim S, Radhakrishnan UP, Rajpurohit SK, Kulkarni V, Jagadeeswaran P (2010) Vivo-Morpholino knockdown of alphaIIb: A novel approach to inhibit thrombocyte function in adult zebrafish. *Blood Cells Mol Dis* 44: 169–174.
26. Kizil C, Brand M (2011) Cerebroventricular microinjection (CVMI) into adult zebrafish brain is an efficient misexpression method for forebrain ventricular cells. *PLoS One* 6: e27395.
27. Kowalik L, Hudspeth AJ (2011) A search for factors specifying tonotopy implicates DNER in hair-cell development in the chick's cochlea. *Dev Biol* 354: 221–231.
28. Liu Y, Yu H, Deaton SK, Szaro BG (2012) Heterogeneous Nuclear Ribonucleoprotein K, an RNA-Binding Protein, Is Required for Optic Axon Regeneration in *Xenopus laevis*. *J Neurosci* 32: 3563–3574.
29. Maki N, Suetsugu-Maki R, Sano S, Nakamura K, Nishimura O, et al. (2010) Oocyte-type linker histone B4 is required for transdifferentiation of somatic cells in vivo. *FASEB J* 24: 3462–3467.
30. Matsuda H, Shi YB (2010) An essential and evolutionarily conserved role of protein arginine methyltransferase 1 for adult intestinal stem cells during postembryonic development. *Stem Cells* 28: 2073–2083.
31. Nazmi A, Mukhopadhyay R, Dutta K, Basu A (2012) STING Mediates Neuronal Innate Immune Response Following Japanese Encephalitis Virus Infection. *Sci Rep* 2: 347.
32. Osorio FG, Navarro CL, Cadiñanos J, López-Mejía IC, Quirós PM, et al. (2011) Splicing-directed therapy in a new mouse model of human accelerated aging. *Sci Transl Med* 3: 106ra107.
33. Owen LA, Uehara H, Cahoon J, Huang W, Simonis J, et al. (2012) Morpholino-mediated increase in soluble Flt-1 expression results in decreased ocular and tumor neovascularization. *PLoS One* 7: e33576.
34. Parra MK, Gallagher TL, Amacher SL, Mohandas N, Conboy JG (2012) Deep intron elements mediate nested splicing events at consecutive AG dinucleotides to regulate alternative 3' splice site choice in vertebrate 4.1 genes. *Mol Cell Biol* 32: 2044–2053.
35. Parra MK, Gee S, Mohandas N, Conboy JG (2011) Efficient in vivo manipulation of alternative pre-mRNA splicing events using antisense morpholinos in mice. *J Biol Chem* 286: 6033–6039.
36. Quinn M, Ueno Y, Pac HY, Huang L, Frampton G, et al. (2012) Suppression of the HPA axis during extrahepatic biliary obstruction induces cholangiocyte proliferation in the rat. *Am J Physiol Gastrointest Liver Physiol* 302: G182–193.
37. Reissner KJ, Sartor GC, Vazey EM, Dunn TE, Aston-Jones G, et al. (2012) Use of vivo-morpholinos for control of protein expression in the adult rat brain. *J Neurosci Methods* 203: 354–360.
38. Stein DA (2008) Inhibition of RNA virus infections with peptide-conjugated morpholino oligomers. *Curr Pharm Des* 14: 2619–2634.
39. Vera T, Stec DE (2010) Moderate hyperbilirubinemia improves renal hemodynamics in ANG II-dependent hypertension. *Am J Physiol Regul Integr Comp Physiol* 299: R1044–1049.
40. Shi YB, Hasebe T, Fu L, Fujimoto K, Ishizuya-Oka A (2011) The development of the adult intestinal stem cells: Insights from studies on thyroid hormone-dependent amphibian metamorphosis. *Cell Biosci* 1: 30.
41. Taniguchi-Ikeda M, Kobayashi K, Kanagawa M, Yu CC, Mori K, et al. (2011) Pathogenic exon-trapping by SVA retrotransposon and rescue in Fukuyama muscular dystrophy. *Nature* 478: 127–131.
42. Warfield KL, Panchal RG, Aman MJ, Bavari S (2006) Antisense treatments for biothreat agents. *Curr Opin Mol Ther* 8: 93–103.
43. Widrick JJ, Jiang S, Choi SJ, Knuth ST, Morcos PA (2011) An octaguanidine-morpholino oligo conjugate improves muscle function of mdx mice. *Muscle Nerve* 44: 563–570.
44. Zammarchi F, de Stanchina E, Bourmazou E, Supakorndej T, Martires K, et al. (2011) Antitumorigenic potential of STAT3 alternative splicing modulation. *Proc Natl Acad Sci U S A* 108: 17779–17784.
45. Ferguson DP (2011) The Effect of Vivo-morpholinos on Dopamine Receptor 1 (*Drd1*) and Physical Activity in Mice. *Experimental Biology Conference*. Washington DC.
46. Emerich DF, Dean RL, Osborn C, Bartus RT (2001) The development of the bradykinin agonist labradimil as a means to increase the permeability of the blood-brain barrier: from concept to clinical evaluation. *Clin Pharmacokinet* 40: 105–123.
47. Doctrww S, Abelleira S, Curry L, Hellerharrison R, Kozarich J, et al. (1994) The Bradykinin Analog RMP-7 Increases Intracellular Free Calcium Levels In Rat-Brain Microvascular Endothelial-Cells. *Journal of Pharmacology and Experimental Therapeutics* 271: 229–237.
48. Lightfoot JT, Leamy L, Pomp D, Turner MJ, Fodor AA, et al. (2010) Strain screen and haplotype association mapping of wheel running in inbred mouse strains. *J Appl Physiol* 109: 623–634.
49. Zhou Z, Kim J, Insolera R, Peng X, Fink DJ, et al. (2011) Rho GTPase regulation of  $\alpha$ -synuclein and VMAT2: implications for pathogenesis of Parkinson's disease. *Mol Cell Neurosci* 48: 29–37.
50. Colebrooke RE, Humby T, Lynch PJ, McGowan DP, Xia J, et al. (2006) Age-related decline in striatal dopamine content and motor performance occurs in the absence of nigral cell loss in a genetic mouse model of Parkinson's disease. *Eur J Neurosci* 24: 2622–2630.
51. Mason SS, Baker KB, Davis KW, Pogorelov VM, Malbari MM, et al. (2009) Differential sensitivity to SSRI and tricyclic antidepressants in juvenile and adult mice of three strains. *Eur J Pharmacol* 602: 306–315.
52. Xiong N, Xiong J, Khare G, Chen C, Huang J, et al. (2011) Edaravone guards dopamine neurons in a rotenone model for Parkinson's disease. *PLoS One* 6: e20677.
53. Biolo G, Maggi SP, Williams BD, Tipton KD, Wolfe RR (1995) Increased rates of muscle protein turnover and amino acid transport after resistance exercise in humans. *Am J Physiol* 268: E514–520.
54. Colebrooke RE, Chan PM, Lynch PJ, Mooslehner K, Emson PC (2007) Differential gene expression in the striatum of mice with very low expression of the vesicular monoamine transporter type 2 gene. *Brain Res* 1152: 10–16.
55. Guillot TS, Richardson JR, Wang MZ, Li YJ, Taylor TN, et al. (2008) PACAP38 increases vesicular monoamine transporter 2 (VMAT2) expression and attenuates methamphetamine toxicity. *Neuropeptides* 42: 423–434.
56. Fueger PT, Li CY, Ayala JE, Shearer J, Bracy DP, et al. (2007) Glucose kinetics and exercise tolerance in mice lacking the GLUT4 glucose transporter. *J Physiol* 582: 801–812.
57. Wasserman DH, Kang L, Ayala JE, Fueger PT, Lee-Young RS (2011) The physiological regulation of glucose flux into muscle in vivo. *J Exp Biol* 214: 254–262.
58. Fukushima S, Shen H, Hata H, Ohara A, Ohmi K, et al. (2007) Methamphetamine-induced locomotor activity and sensitization in dopamine transporter and vesicular monoamine transporter 2 double mutant mice. *Psychopharmacology (Berl)* 193: 55–62.
59. Hood DA (2001) Invited Review: contractile activity-induced mitochondrial biogenesis in skeletal muscle. *J Appl Physiol* 90: 1137–1157.
